# Supplementary material for: Dairy Foods and Body Mass Index over 10-Year: Evidence from the Caerphilly Prospective Cohort Study
Source: MDPI journal article supplement (doi:10.3390/nu10101515), 2018-10-16
Supplement: s1 [file s1]

**Supplemental Table S1.** Dairy consumption over 10-year following up in the Caerphilly Prospective Cohort Study.

| Dairy consumption (g/d) | Baseline |     | 5-years |     | 10-years |     | <i>P</i> -value (baseline vs. 5-year)* | <i>P</i> -value (baseline vs. 10-year) † |
|-------------------------|----------|-----|---------|-----|----------|-----|----------------------------------------|------------------------------------------|
|                         | Mean     | SE  | Mean    | SE  | Mean     | SE  |                                        |                                          |
| Milk                    | 288.4    | 4.5 | 241.7   | 4.6 | 188.7    | 4.7 | <0.0001                                | <0.0001                                  |
| Cheese                  | 18.4     | 0.3 | 18.3    | 0.3 | 15.2     | 0.3 | 0.7335                                 | <0.0001                                  |
| Cream                   | 1.7      | 0.1 | 1.4     | 0.1 | 1.3      | 0.1 | 0.004                                  | <0.0001                                  |
| Butter                  | 24.5     | 0.5 | 17.9    | 0.4 | 11.5     | 0.4 | 0.004                                  | <0.0001                                  |
| Total dairy             | 333.0    | 4.5 | 279.4   | 4.7 | 216.6    | 4.9 | <0.0001                                | <0.0001                                  |

SE: Standard Error;

\*Data show *t*-test significance between baseline and 5-year following up.

†Data show *t*-test significance between baseline and 10-year following up.
